# Supplementary material
Source: PubMed Central journal article supplement (PMC3947289)
Supplement: NIHMS538995-supplement-125_2013_3101_MOESM3_ESM.pdf [file NIHMS538995-supplement-125_2013_3101_MOESM3_ESM.pdf]

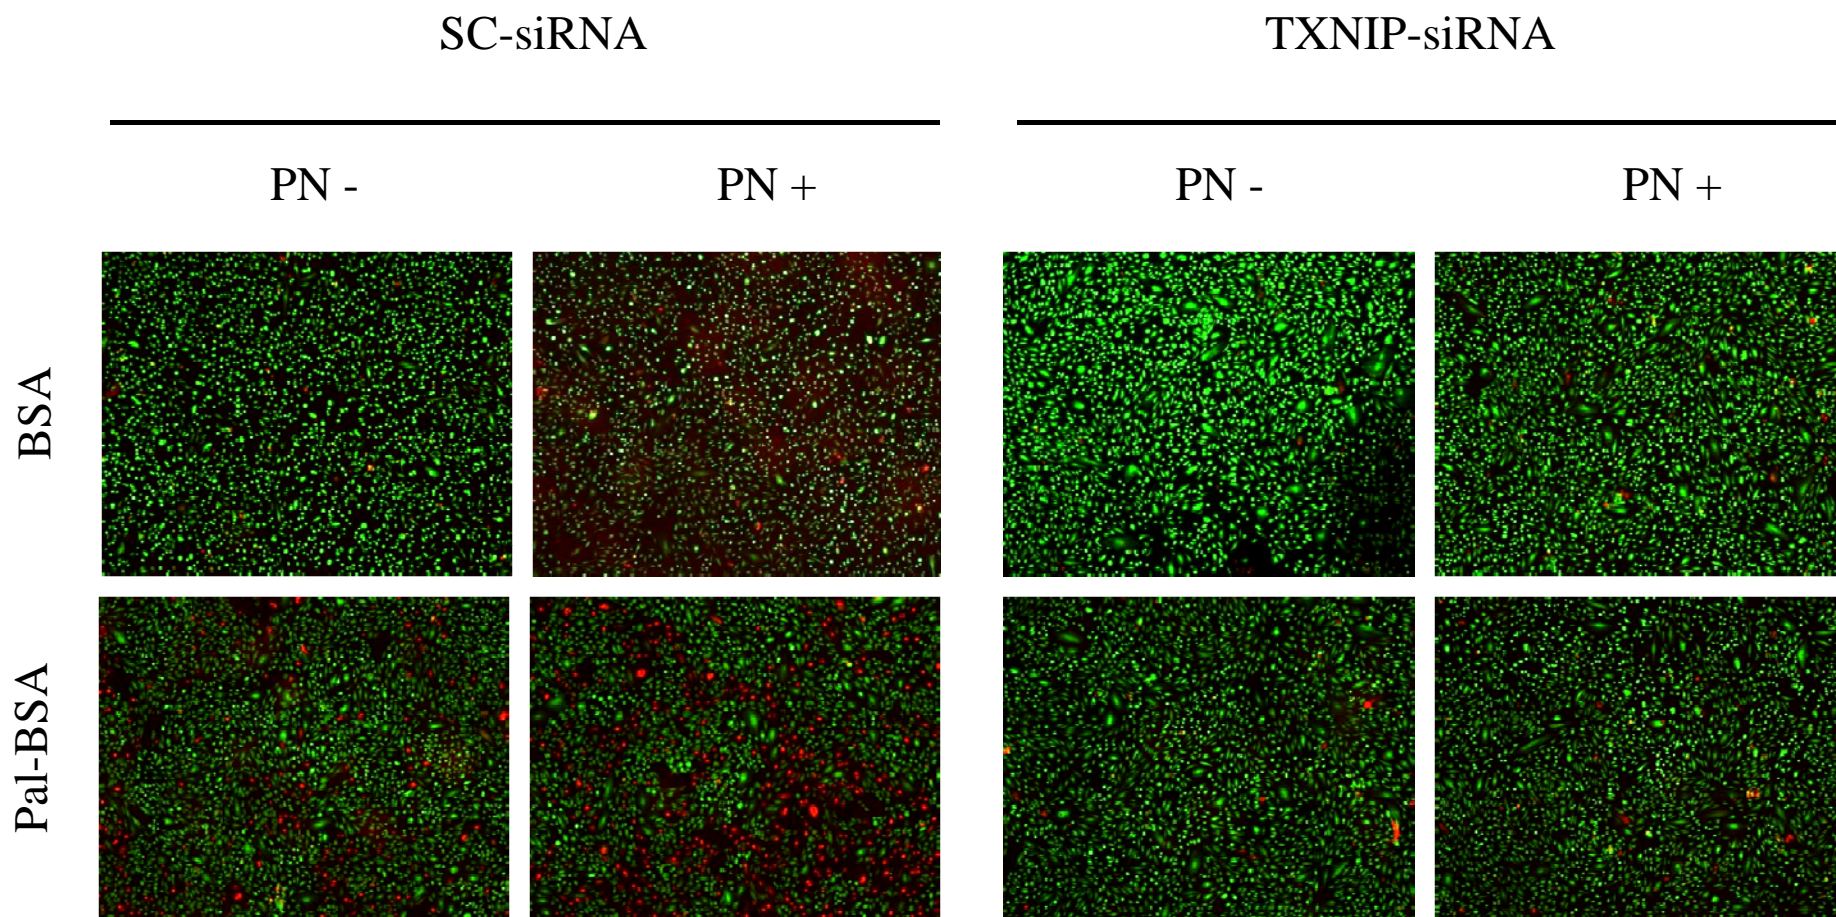

**Supplementary Fig. 3:** Representative images of HRE cell viability transfected with either 0.6 $\mu$ mol/l scrambled siRNA (SC group) or TXNIP (Txsi group) after incubation with PN alone, Pal-BSA alone or both (Pal-BSA+PN).
