# Supplementary material
Source: PubMed Central journal article supplement (PMC3947289)
Supplement: NIHMS538995-supplement-125_2013_3101_MOESM4_ESM.pdf [file NIHMS538995-supplement-125_2013_3101_MOESM4_ESM.pdf]

**Table. 1** List of primers that were used to detect inflammasome gene expression using realtime PCR.

| Gene  | Primers                                                              |
|-------|----------------------------------------------------------------------|
| TXNIP | Forward AAGCTGTCCTCAGTCAGAGGCAAT<br>Reverse ATGACTTTCTTGGAGCCAGGGACA |
| NLRP3 | Forward CAGACCTCCAAGACCACGACTG<br>Reverse CATCCGCAGCCAATGAACAGAG     |
| NLRP1 | Forward TAGATGAGCCAGCATGGGTCTTG<br>Reverse TTCTGTAGAGCTGTGGTGCGAG    |
| NLRC4 | Forward CGTCATCACCGAGTAGAGCA<br>Reverse CTCAGGCGGATGAAGAAGAC         |
